# Supplementary material for: Mussel-inspired dynamic facet-selective capping approach to highly uniform α-calcium sulfate hemihydrate crystals
Source: Royal Society of Chemistry journal article supplement (doi:10.1039/d3ra00835e), 2023-01-01
Supplement: d3ra00835e1.pdf [file d3ra00835e1.pdf]

## Supporting Information

### **Mussel-Inspired Dynamic Facet-Selective Capping Approach to Highly Uniform $\alpha$ -Calcium Sulfate Hemihydrate Crystals**

Fu Feng<sup>a</sup>, Yu-xin Cui<sup>a</sup>, Yong-qi Hu<sup>a</sup>, Sheng Hu<sup>a</sup> and Ai-dong Zhang<sup>\*b</sup>

<sup>a</sup> College of Chemistry and Environmental Engineering, Hubei Minzu University, Enshi, Hubei  
445000, China.

E-mail: fengfu2010@163.com

<sup>b</sup> Key Laboratory of Pesticide and Chemical Biology of Ministry of Education, College of  
Chemistry, Central China Normal University, Wuhan 430079, China.

## Table of Contents

|                                                                                                                                                          |    |
|----------------------------------------------------------------------------------------------------------------------------------------------------------|----|
| <b>Comment S1</b> Materials and characterization for DPA-PEI and $\alpha$ -HH crystals.....                                                              | 3  |
| <b>Comment S2</b> Syntheses of DPA-PEI.....                                                                                                              | 4  |
| <b>Comment S3</b> Controlled growth of $\alpha$ -HH crystals.....                                                                                        | 5  |
| <b>Comment S4</b> Mechanical strength measurement.....                                                                                                   | 5  |
| <b>Fig. S1</b> $^1\text{H}$ NMR of DPA-PEI with a DPA substitution degree of 30%.....                                                                    | 6  |
| <b>Fig. S2</b> FT-IR spectrum of DPA-PEI with a DPA substitution degree of 30%.....                                                                      | 6  |
| <b>Fig. S3</b> XRD patterns of HH crystals synthesized at different concentrations.....                                                                  | 7  |
| <b>Fig. S4</b> TG-DSC curves of $\alpha$ -HH crystals synthesized at pH 5.5 and DPA-PEI 2.0 g L <sup>-1</sup> .....                                      | 7  |
| <b>Fig. S5</b> SEM images of $\alpha$ -HH crystals with thin hexagonal plates.....                                                                       | 8  |
| <b>Fig. S6</b> Diameter distributions of $\alpha$ -HH crystals synthesized at different concentrations.....                                              | 9  |
| <b>Fig. S7</b> Aspect ratio distributions of $\alpha$ -HH crystals synthesized at different concentrations.....                                          | 10 |
| <b>Fig. S8</b> SEM images of $\alpha$ -HH crystals synthesized at different pH.....                                                                      | 10 |
| <b>Fig. S9</b> Concentration effect of DPA-PEI on the time for complete transformation of $\alpha$ -HH from gypsum (pH = 5.5).....                       | 11 |
| <b>Fig. S10</b> FT-IR spectra of $\alpha$ -HH synthesized at different concentrations of DPA-PEI.....                                                    | 11 |
| <b>Fig. S11</b> TEM image of the oriented aggregation state of nanorods after growth for 1 h.....                                                        | 12 |
| <b>Fig. S12</b> {002} facets evolution of $\alpha$ -HH crystals revealed by SEM in full-view and high-resolution SEM images with different time.....     | 12 |
| <b>Fig. S13</b> (110)/(010) face evolution of $\alpha$ -HH crystals revealed by SEM in full-view and high-resolution SEM images with different time..... | 13 |
| <b>Table S1</b> Data of Molecular weights of DPA-PEI with 30% DPA measured with GPC in triplicate.....                                                   | 13 |
| <b>References</b> .....                                                                                                                                  | 14 |

### **Comment S1: Materials and characterization for DPA-PEI and $\alpha$ -HH crystals**

**Materials:** All of the chemicals and solvents used in the experiment were of analytical grade without further purification. Gypsum ( $\text{CaSO}_4 \cdot 2\text{H}_2\text{O}$ ), calcium chloride, potassium chloride, sodium hydroxide, and hydrochloric acid were purchased from Sinopharm Chemical Reagent Co., Ltd. Dialysis bags (with cut off molecular weight of 3 kDa) were purchased from Shanghai Green Bird Science and Technology Development Co. (Shanghai, China). 3-(3,4-Dihydroxyphenyl) propionic acid (DPA) (98%), branch poly(ethylenimine) (PEI) (MW = 20 kDa with a ratio of 1:2:1 of primary: secondary: tertiary amines), and N-ethyl-N'-(3-dimethylaminopropyl)-carbodiimide hydrochloride (EDC) (99 %) were purchased from Sigma-Aldrich.

**Characterization:** Powder X-ray diffraction (XRD) patterns were recorded on a Rigaku Rotaflex Dmax-2500 X-ray diffractometer with Cu  $K\alpha$  radiation ( $\lambda = 1.5418 \text{ \AA}$ ). Scanning electron microscopy (SEM) measurements were performed on a JEOL JSM-6700F microscope operated at 5 kV. Transmission electron microscopic (TEM) images were acquired on a JEOL JEM-2100F microscope with accelerating voltage of 200 kV. Thermogravimetry and differential scanning calorimetry (TG-DSC) were performed on a STA-409PC analyzer (Netzsh, Germany) with a heating rate of  $5 \text{ }^\circ\text{C min}^{-1}$  in a nitrogen atmosphere. Fourier transform infrared (FT-IR) characterizations were done on a Bruker Tensor 27 FTIR spectrometer.  $^1\text{H}$  NMR spectra were collected on a Varian Mercury Plus-400 MHz spectrometer using  $\text{D}_2\text{O}$  as the solvent and TMS as an internal standard. Compressive and flexural strengths of the crystals after hydration setting were performed on a MTS-810 analyzer (MTS, USA) following the procedure in accordance with ASTM C 472-1999, and the result was expressed as an average value of at least three independent determinations.

**Comment S2: Synthesis of 3-(3,4-dihydroxyphenyl)propionic acid grafted poly(ethylenimine)  
(DPA-PEI)**

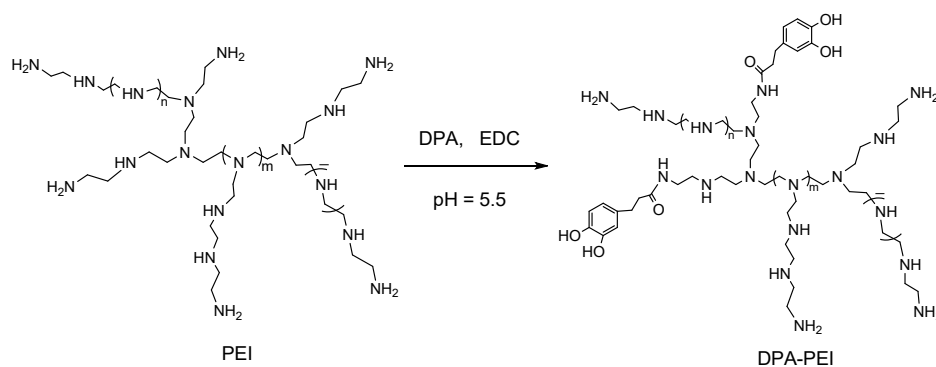

Synthetic route of DPA-PEI.

The synthesis was performed by following a reported procedure<sup>1</sup> with some modification, and exemplified using synthesis of the DPA-PEI with a 30% substitution degree. Briefly, PEI (2.0 g,  $M_w = 20000 \text{ g mol}^{-1}$ ) was dissolved in 200 mL of deionized water adjusted to pH 5.5 using 1 M HCl solution. 3-(3,4-dihydroxyphenyl)propionic acid (DPA, 1.06 g, 5.8 mmol) and EDC (2.24 g, 11.6 mmol) were added. The reaction was carried out at room temperature for 2.5 h during which the solution pH was kept at 5.5 by adding proper amount of 1.0 M NaOH. After reaction, the resultant mixture was dialyzed using a dialysis membrane against distilled water for 3 d to remove unreacted chemicals and byproducts. The substitution degree of DPA on the PEI chain was estimated to be 30% by the ninhydrin test.<sup>2</sup> The polymer has a weight-average molecular weight ( $M_w$ ) of  $26365 \text{ g mol}^{-1}$  as characterized with GPC and a isoelectric point (pI) of 9.41 determined by a capillary isoelectric focusing-whole column imaging detection.<sup>3</sup> The molecular structure of the polymer was characterized by <sup>1</sup>H NMR and FT-IR.

<sup>1</sup>H NMR (400 MHz, D<sub>2</sub>O):  $\delta = 2.42$  (t,  $J = 8.0 \text{ Hz}$ , 2H, Ar-CH<sub>2</sub>), 2.40 (t,  $J = 8.0 \text{ Hz}$ , 2H, O=C-CH<sub>2</sub>), 2.69(m, 53H, PEI-CH<sub>2</sub>), 6.55 (d,  $J = 8.0 \text{ Hz}$ , 1H, Ar), 6.67(s, 1H, Ar), 6.72 (d,  $J = 8.0 \text{ Hz}$ , 1H, Ar) ppm. FT-IR (KBr)  $\nu$ : 3445 s (NH), 2932-2850 s (CH<sub>2</sub>), 1652 m (CO-NH); 1525 w (NH); 1475 w (Ar); 1043 s (C-N)  $\text{cm}^{-1}$ .

### **Comment S3: Controlled growth of $\alpha$ -HH crystals**

A mixed solution (60 mL H<sub>2</sub>O, 15.5 g CaCl<sub>2</sub>, 0.5 g KCl and DPA-PEI, 0-5.0 g L<sup>-1</sup>, M<sub>w</sub> = 26365 g mol<sup>-1</sup>) with different pH (4.0~8.5) was added into a 250 mL three-neck flask reactor equipped with a glass condenser. Then 47 g of gypsum (CaSO<sub>4</sub>·2H<sub>2</sub>O) was introduced to form a slurry with stirring by a Teflon impeller at a constant rate of 180 rpm. The mixed solution was heated at a fixed temperature (97 ± 0.5 °C). During the reaction, aliquots of 5 mL slurry were withdrawn at fixed time intervals and filtrated by vacuum filtration. The solid samples were immediately washed with boiling deionized water twice and dried at 45 °C in an oven for 2 h for characterizations.

### **Comment S4: Mechanical strength measurement**

#### **Compressive and bending strengths of hydration molding of $\alpha$ -HH**

The preparation of hydration molding of  $\alpha$ -HH was done according to the procedures described in GB/T 17669.3 (China national standard for gypsum plasters). The weight ratio of water to  $\alpha$ -HH crystals in modeling was 0.32. The paste was cast into a stainless steel mold with the size of 20 × 20 × 80 mm and compacted by jolting. After maintained for 2 h, the molding block was demolded and stored in a curing chest maintained at 25 ± 2 °C and 65 ± 5% RH for 7-10 days. The molding block was tested for bending strength measurement with three-point loading in a span of 50 mm. The loading rate was 0.02 kN/s. The compressive strength was measured with a loading area of 0.0004 m<sup>2</sup> and loading rate of 0.6 kN/s. All measurements were done in triplicate.

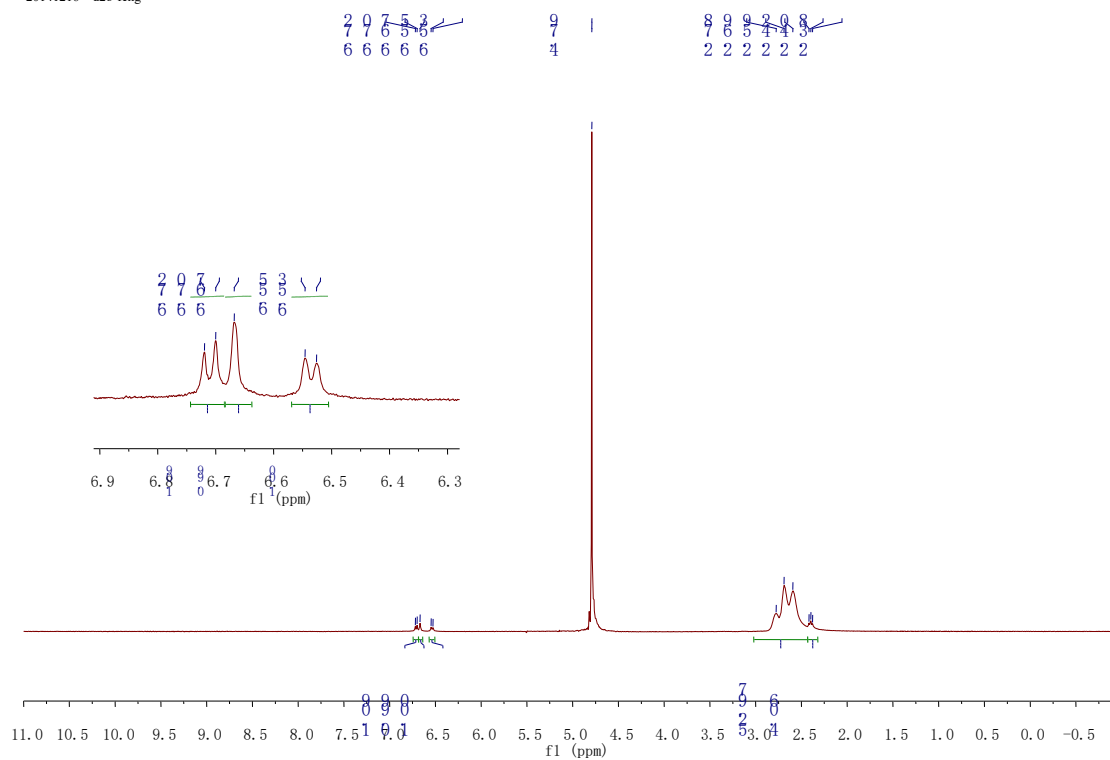

**Fig. S1**  $^1\text{H}$  NMR of DPA-PEI with a DPA substitution degree of 30%.

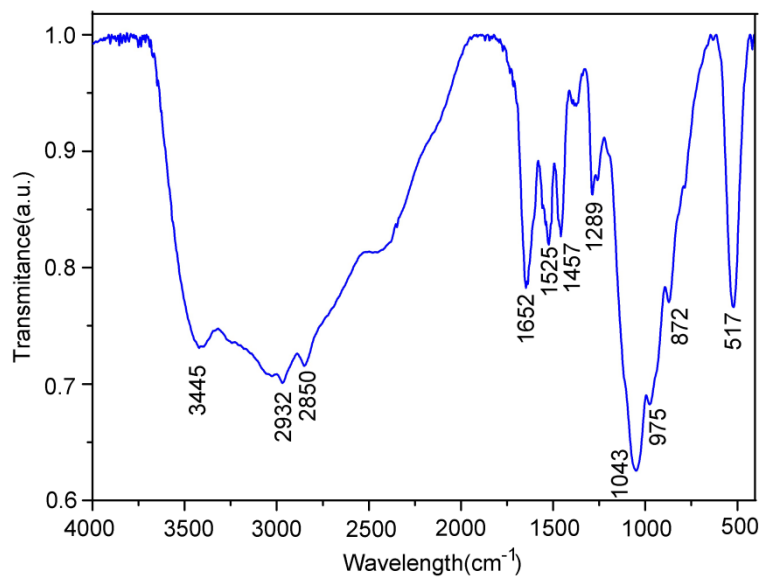

**Fig. S2** FT-IR spectrum of DPA-PEI with a DPA substitution degree of 30%.

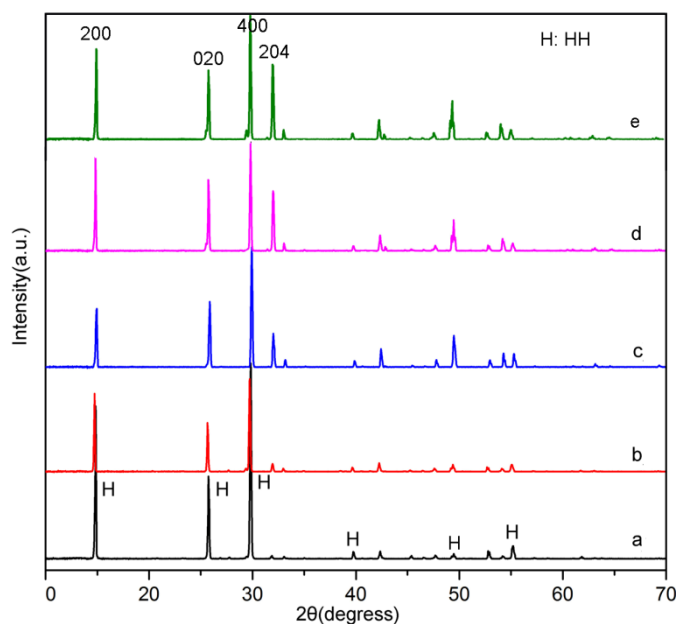

**Fig. S3** XRD patterns of HH crystals synthesized at different concentrations.

(DPA-PEI: (a) 0.0 g L<sup>-1</sup>, (b) 1.0 g L<sup>-1</sup>, (c) 2.0 g L<sup>-1</sup>, (d) 3.0 g L<sup>-1</sup>, (e) 5.0 g L<sup>-1</sup> (pH = 5.5)).

The XRD patterns show main peaks at  $2\theta$  of 14.7°, 25.6°, and 29.7°, which can be indexed to a pure HH phase (PDF-ICDD 047-0964).

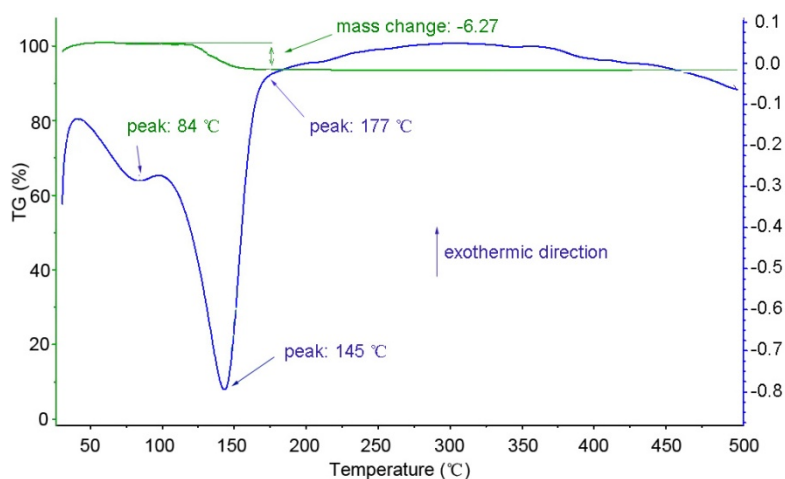

**Fig. S4** TG-DSC curves of  $\alpha$ -HH crystals synthesized at pH 5.5 and DPA-PEI 2.0 g L<sup>-1</sup>.

The TG curve reveals a water release of 6.27 wt % when the crystals are heated from 132 to 180 °C, which is approximate to the theoretical crystal water content of 6.21 % in  $\alpha$ -HH. The simultaneous DSC curve shows an endothermic peak at ~145 °C, followed by an exothermic peak

at  $\sim 177$  °C, which is the characteristic profile of the  $\alpha$ -HH crystal phase.<sup>4</sup> Thus the obtained crystals are pure  $\alpha$ -HH crystals, in accordance with the result from XRD.

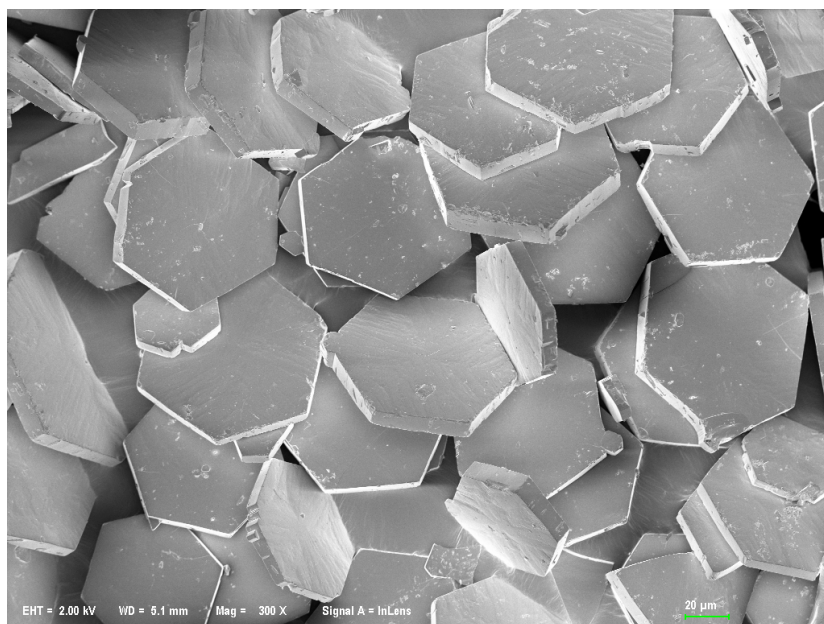

**Fig. S5** SEM images of  $\alpha$ -HH crystals with thin hexagonal plates.



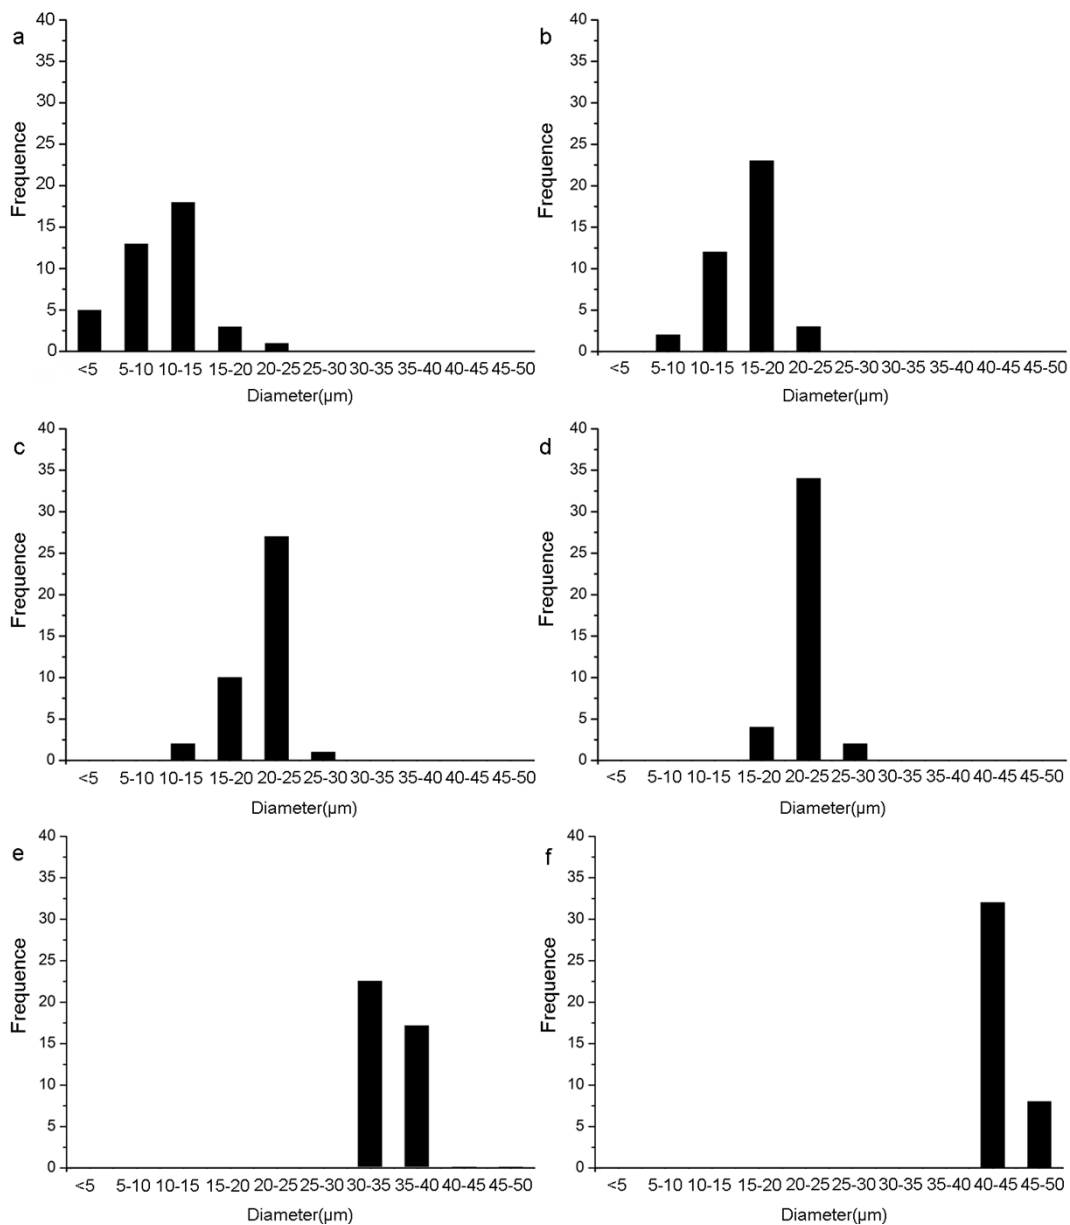

**Fig. S6** Diameter distributions of  $\alpha$ -HH crystals synthesized at different concentrations.

(DPA-PEI: (a) 0.0 g L<sup>-1</sup>, (b) 1.0 g L<sup>-1</sup>, (c) 2.0 g L<sup>-1</sup>, (d) 3.0 g L<sup>-1</sup>, (e) 4.0 g L<sup>-1</sup>, (f) 5.0 g L<sup>-1</sup>

(pH = 5.5)).

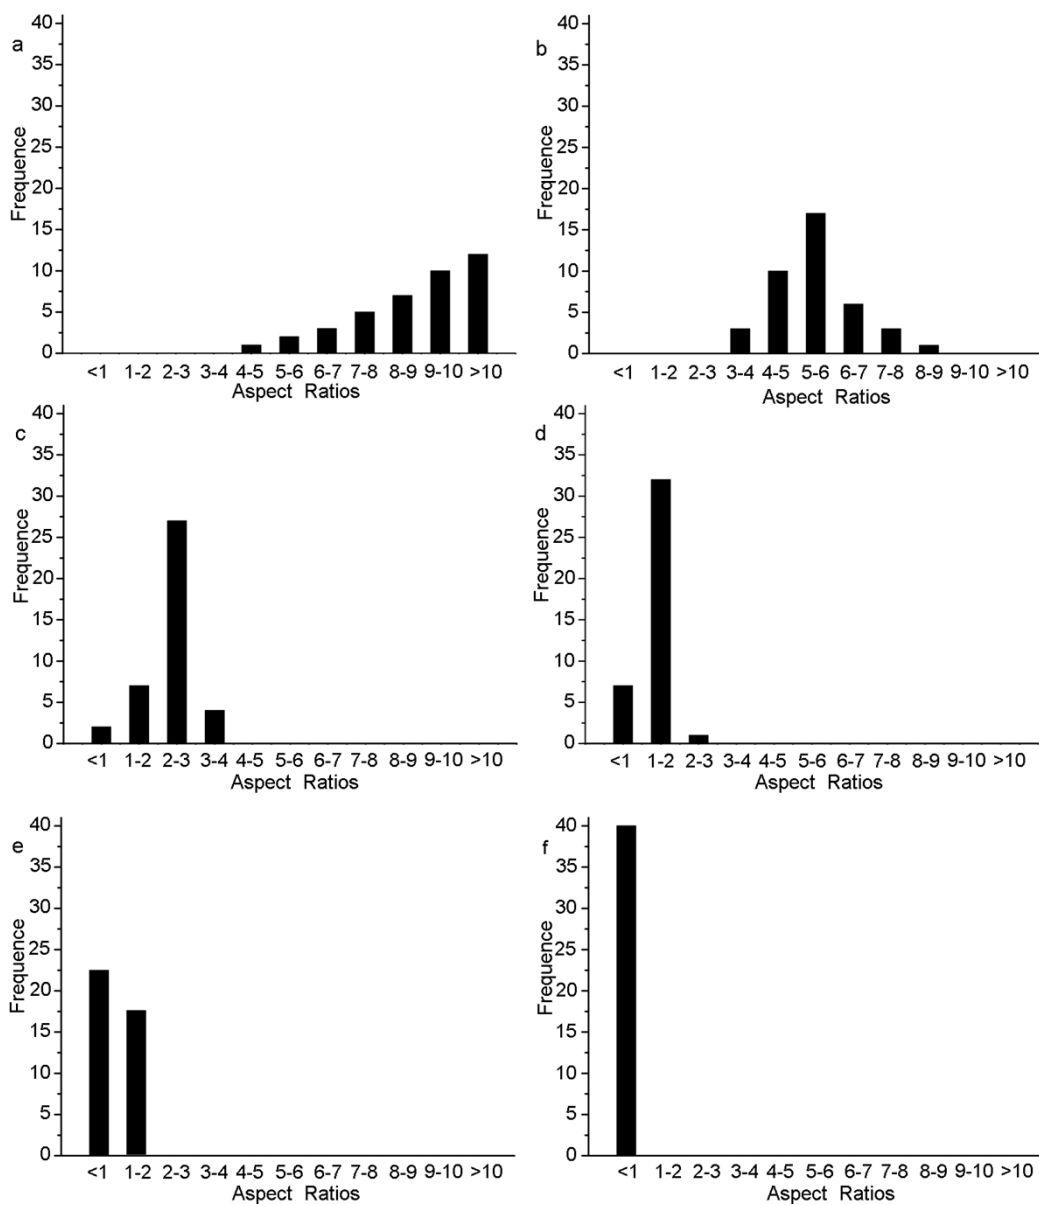

**Fig. S7** Aspect ratio distributions of  $\alpha$ -HH crystals synthesized at different concentrations. (DPA-PEI: (a) 0.0 g L<sup>-1</sup>, (b) 1.0 g L<sup>-1</sup>, (c) 2.0 g L<sup>-1</sup>, (d) 3.0 g L<sup>-1</sup>, (e) 4.0 g L<sup>-1</sup>, (f) 5.0 g L<sup>-1</sup> (pH = 5.5)).

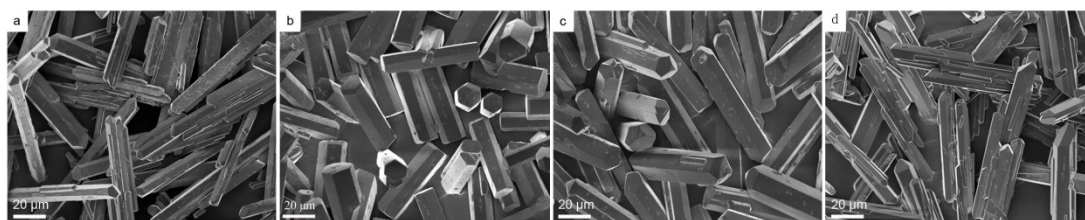

**Fig. S8** SEM images of  $\alpha$ -HH crystals synthesized at different pH. ((a) pH 4.0, (b) pH 5.5, (c) pH 7.0, (d) pH 8.5 (DPA-PEI = 2.0 g L<sup>-1</sup>)).

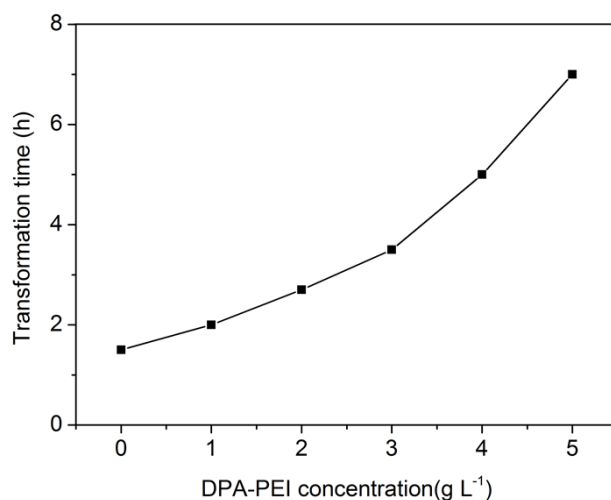

**Fig. S9** Concentration effect of DPA-PEI on the time for complete transformation of  $\alpha$ -HH from gypsum (pH = 5.5).

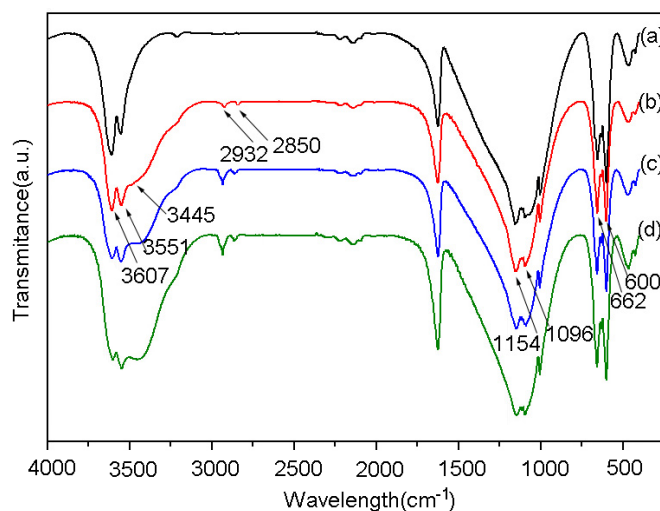

**Fig. S10** FT-IR spectra of  $\alpha$ -HH synthesized at different concentrations of DPA-PEI.

( (a) 0.0 g L<sup>-1</sup>, (b) 1.0 g L<sup>-1</sup>, (c) 3.0 g L<sup>-1</sup>, (d) 5.0 g L<sup>-1</sup> ( pH = 5.5)).

Fig. S10 shows the FT-IR spectra of  $\alpha$ -HH synthesized without and with the existence of DPA-PEI. The bands at 1154, 1096, 662 and 600 cm<sup>-1</sup> can be assigned to SO<sub>4</sub><sup>2-</sup> stretches and the bands at 3607 and 3551 cm<sup>-1</sup> can be assigned to O-H stretching. The bands at 3445 cm<sup>-1</sup> can be assigned to N-H stretching, which increases in width with an increase in the concentration of DPA-PEI (Figure S9b-d). Two bands are observed in the region of 2800-3000 cm<sup>-1</sup>, which are assigned to the asymmetric (2932 cm<sup>-1</sup>) and symmetric (2850 cm<sup>-1</sup>) stretching vibrations of CH<sub>2</sub>. The data indicate the presence of DPA-PEI on crystal surface.

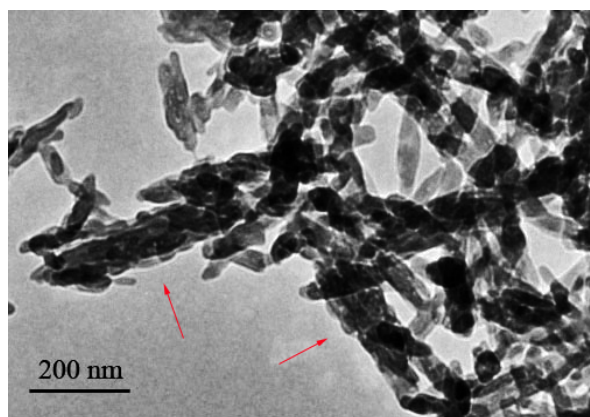

**Figure S11.** TEM image of the oriented aggregation state of nanorods after growth for 1 h. (at DPA-PEI  $1.0 \text{ g L}^{-1}$  and pH 5.5. Red arrows highlight the co-oriented nanorods in the aggregates).

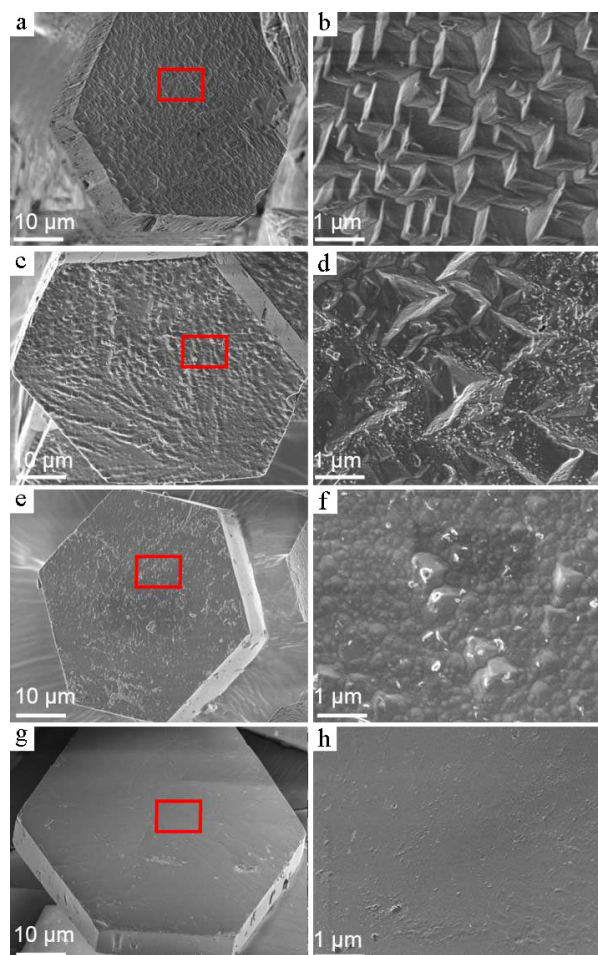

**Fig. S12** {002} facets evolution of  $\alpha$ -HH crystals revealed by SEM in full-view and high-resolution SEM images with different time.

(( a,b) 4.0 h; (c,d) 4.5 h; (e,f) 5.5 h; (g,h) 7.0 h,  $C_{\text{DPA-PEI}} = 5.0 \text{ g L}^{-1}$ , pH = 5.5).

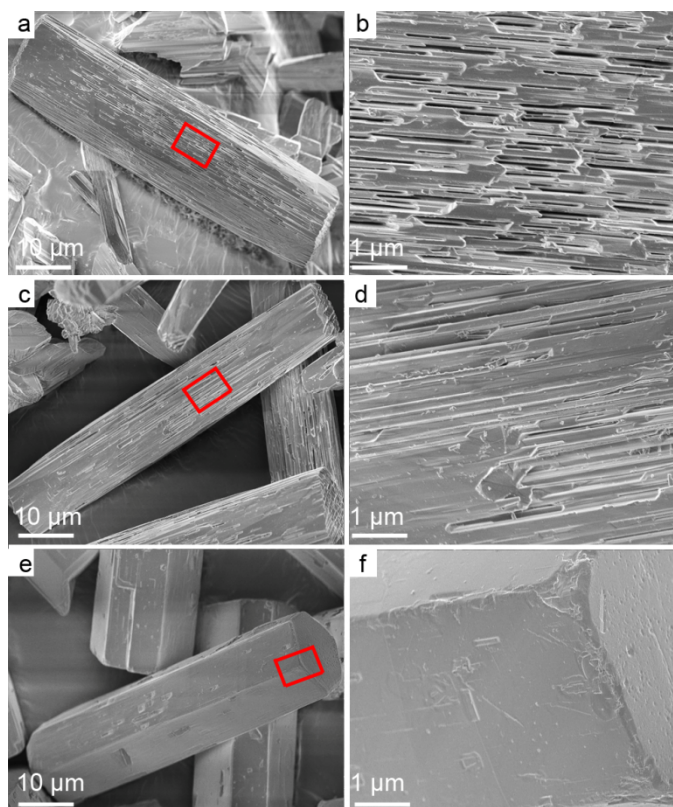

**Fig. S13** (110)/(010) face evolution of  $\alpha$ -HH crystals revealed by SEM in full-view and high-resolution SEM images with different time.

((a,b) 2.0 h; (c,d) 2.5 h; (e,f) 3.5 h,  $C_{\text{DPA-PEI}} = 2.0 \text{ g L}^{-1}$ , pH = 5.5).

**Table S1.** Data of Molecular weights of DPA-PEI with 30% DPA measured with GPC in triplicate.

| test 1           | test 2           | test 3           | average          |
|------------------|------------------|------------------|------------------|
| $M_n = 12063.39$ | $M_n = 8686.82$  | $M_n = 9507.49$  | $M_n = 10085.9$  |
| $M_w = 26177.56$ | $M_w = 26581.68$ | $M_w = 26335.76$ | $M_w = 26365.00$ |
| $M_w/M_n = 2.17$ | $M_w/M_n = 3.06$ | $M_w/M_n = 2.77$ | $M_w/M_n = 2.61$ |

## References

- (1) Lee, H. S.; Lee, Y. H.; Statz, A. R.; Rho, J. S.; Park, T. G. Messersmith, P. B. *Adv. Mater.* **2008**, *20*, 1619-1623.
- (2) Prochazkova, S.; Vårum, K. M.; Østgaard, K. *Carbohydr. Polym.* **1999**, *38*, 115-122.
- (3) Goodridge, L.; Goodridge, C.; Wu, J.; Griffiths, M.; Pawliszyn, J. *Anal. Chem.* **2004**, *76*, 48-52.
- (4) Guan, B. H.; Yang, L. C.; Wu, Z. B.; Shen, Z. X. Ma, X. F. Ye, Q. Q. *Fuel* **2009**, *88*, 1286-1293.
